# Supplementary material
Source: Springer Nature journal article supplement (https://www.springermedizin.de/resource/supplementary/13054_2012_1682_MOESM7_ESM.pdf/9711252)

**a**

6a. All patients

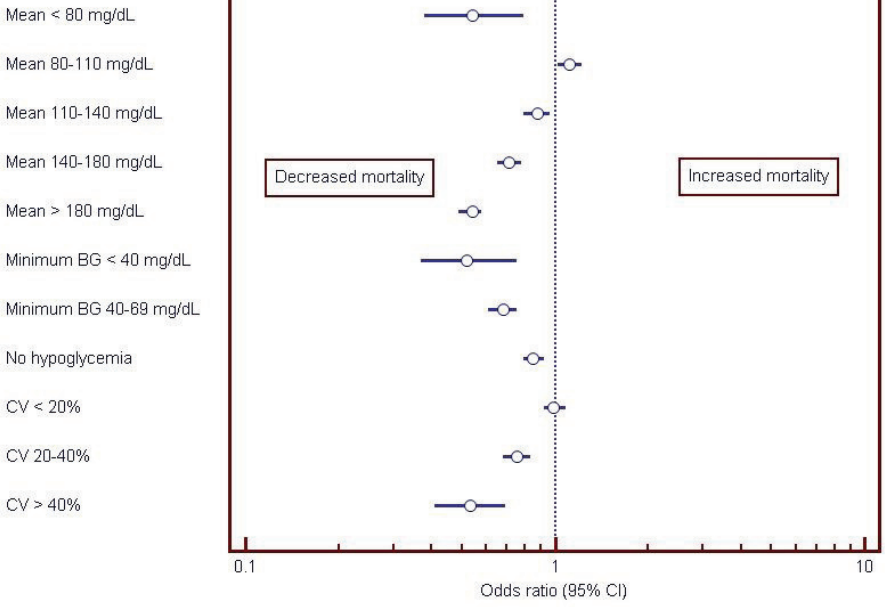**b**

6b. Medical patients

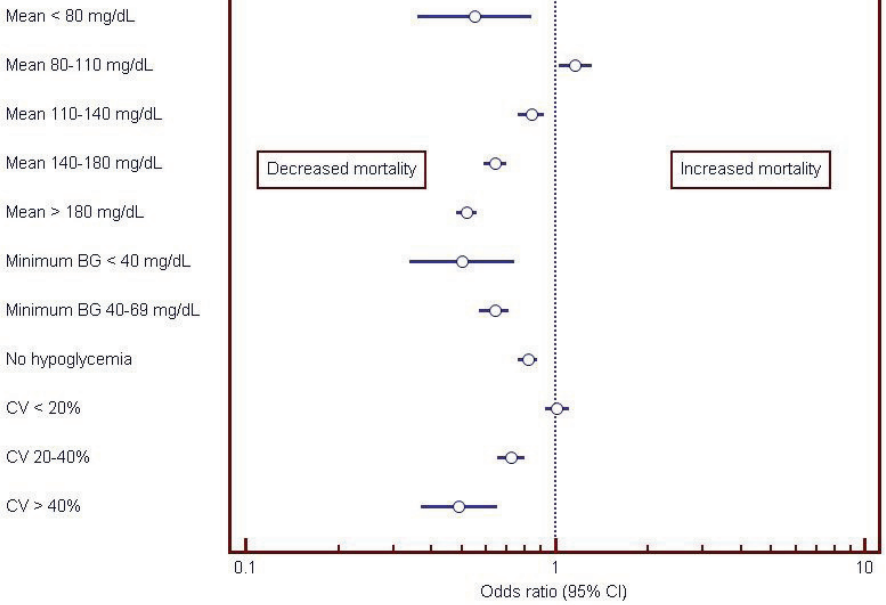**c**

Figure 6c. Surgical patients

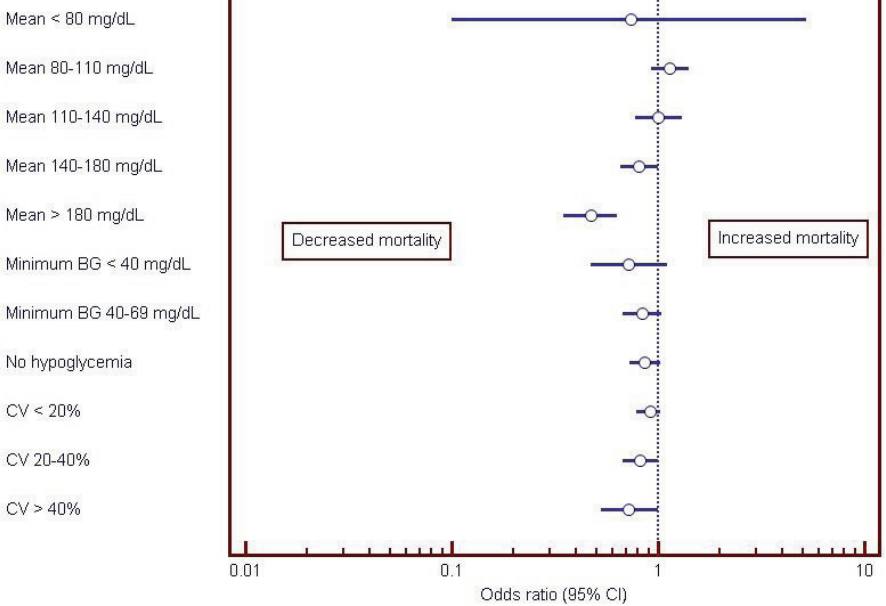

Supplement: MOESM7 [file 9711252]
